# Supplementary material
Source: publisher figshare collection journal article supplement (https://acs.figshare.com/ndownloader/files/5100379)
Supplement: Supplementary file 1 [file 5100379]

 
data_1 
 
_audit_creation_method            SHELXL-97 
_chemical_name_systematic 
; 
 ? 
; 
_chemical_name_common             ? 
_chemical_melting_point           ? 
_chemical_formula_moiety          ? 
_chemical_formula_sum 
 'C36 H25 N12 Ni3 O12' 
_chemical_formula_weight          993.81 
 
loop_ 
 _atom_type_symbol 
 _atom_type_description 
 _atom_type_scat_dispersion_real 
 _atom_type_scat_dispersion_imag 
 _atom_type_scat_source 
 'C'  'C'   0.0033   0.0016 
 'International Tables Vol C Tables 4.2.6.8 and 6.1.1.4' 
 'H'  'H'   0.0000   0.0000 
 'International Tables Vol C Tables 4.2.6.8 and 6.1.1.4' 
 'N'  'N'   0.0061   0.0033 
 'International Tables Vol C Tables 4.2.6.8 and 6.1.1.4' 
 'O'  'O'   0.0106   0.0060 
 'International Tables Vol C Tables 4.2.6.8 and 6.1.1.4' 
 'Ni'  'Ni'   0.3393   1.1124 
 'International Tables Vol C Tables 4.2.6.8 and 6.1.1.4' 
 
_symmetry_cell_setting            triclinic 
_symmetry_space_group_name_H-M    P-1 
 
loop_ 
 _symmetry_equiv_pos_as_xyz 
 'x, y, z' 
 '-x, -y, -z' 
 
_cell_length_a                    8.6311(11) 
_cell_length_b                    11.3015(14) 
_cell_length_c                    11.9468(15) 
_cell_angle_alpha                 112.066(2) 
_cell_angle_beta                  100.134(2) 
_cell_angle_gamma                 108.468(2) 
_cell_volume                      965.0(2) 
_cell_formula_units_Z             1 
_cell_measurement_temperature     293(2) 
_cell_measurement_reflns_used     2836 
_cell_measurement_theta_min       2.6107  
_cell_measurement_theta_max       28.2624  
 
_exptl_crystal_description        block 
_exptl_crystal_colour             green 
_exptl_crystal_size_max           0.239 
_exptl_crystal_size_mid           0.076 
_exptl_crystal_size_min           0.057 
_exptl_crystal_density_meas       ? 
_exptl_crystal_density_diffrn     1.710 
_exptl_crystal_density_method     'not measured' 
_exptl_crystal_F_000              505 
_exptl_absorpt_coefficient_mu     1.530 
_exptl_absorpt_correction_type    Multi-scan 
_exptl_absorpt_correction_T_min   0.684 
_exptl_absorpt_correction_T_max   0.923 
_exptl_absorpt_process_details    ? 
 
_exptl_special_details 
; 
 ? 
; 
 
_diffrn_ambient_temperature       293(2) 
_diffrn_radiation_wavelength      0.71073 
_diffrn_radiation_type            MoK\a 
_diffrn_radiation_source          'fine-focus sealed tube' 
_diffrn_radiation_monochromator   graphite 
_diffrn_measurement_device_type   'Bruker Smart APEX CCD area detector' 
_diffrn_measurement_method        'phi and omega scans' 
_diffrn_detector_area_resol_mean  ? 
_diffrn_standards_number          ? 
_diffrn_standards_interval_count  ? 
_diffrn_standards_interval_time   ? 
_diffrn_standards_decay_%         ? 
_diffrn_reflns_number             5279 
_diffrn_reflns_av_R_equivalents   0.0257 
_diffrn_reflns_av_sigmaI/netI     0.0420 
_diffrn_reflns_limit_h_min        -10 
_diffrn_reflns_limit_h_max        10 
_diffrn_reflns_limit_k_min        -13 
_diffrn_reflns_limit_k_max        13 
_diffrn_reflns_limit_l_min        -7 
_diffrn_reflns_limit_l_max        14 
_diffrn_reflns_theta_min          1.95 
_diffrn_reflns_theta_max          25.50 
_reflns_number_total              3532 
_reflns_number_gt                 2949 
_reflns_threshold_expression      >2sigma(I) 
 
_computing_data_collection        'Bruker SMART' 
_computing_cell_refinement        'Bruker SMART' 
_computing_data_reduction         'Bruker SAINT' 
_computing_structure_solution     'SHELXS-97 (Sheldrick, 1990)' 
_computing_structure_refinement   'SHELXL-97 (Sheldrick, 1997)' 
_computing_molecular_graphics     'Bruker SHELXTL' 
_computing_publication_material   'Bruker SHELXTL' 
 
_refine_special_details 
; 
 Refinement of F^2^ against ALL reflections.  The weighted R-factor wR and 
 goodness of fit S are based on F^2^, conventional R-factors R are based 
 on F, with F set to zero for negative F^2^. The threshold expression of 
 F^2^ > 2sigma(F^2^) is used only for calculating R-factors(gt) etc. and is 
 not relevant to the choice of reflections for refinement.  R-factors based 
 on F^2^ are statistically about twice as large as those based on F, and R- 
 factors based on ALL data will be even larger. 
; 
 
_refine_ls_structure_factor_coef  Fsqd  
_refine_ls_matrix_type            full 
_refine_ls_weighting_scheme       calc  
_refine_ls_weighting_details 
 'calc w=1/[\s^2^(Fo^2^)+(0.0636P)^2^+0.0000P] where P=(Fo^2^+2Fc^2^)/3' 
_atom_sites_solution_primary      direct 
_atom_sites_solution_secondary    difmap 
_atom_sites_solution_hydrogens    geom 
_refine_ls_hydrogen_treatment     mixed 
_refine_ls_extinction_method      none 
_refine_ls_extinction_coef        ? 
_refine_ls_number_reflns          3532 
_refine_ls_number_parameters      330 
_refine_ls_number_restraints      0 
_refine_ls_R_factor_all           0.0437 
_refine_ls_R_factor_gt            0.0358 
_refine_ls_wR_factor_ref          0.1060 
_refine_ls_wR_factor_gt           0.1024 
_refine_ls_goodness_of_fit_ref    1.062 
_refine_ls_restrained_S_all       1.062 
_refine_ls_shift/su_max           0.000 
_refine_ls_shift/su_mean          0.000 
 
loop_ 
 _atom_site_label 
 _atom_site_type_symbol 
 _atom_site_fract_x 
 _atom_site_fract_y 
 _atom_site_fract_z 
 _atom_site_U_iso_or_equiv 
 _atom_site_adp_type 
 _atom_site_occupancy 
 _atom_site_symmetry_multiplicity 
 _atom_site_calc_flag 
 _atom_site_refinement_flags 
 _atom_site_disorder_assembly 
 _atom_site_disorder_group 
Ni1 Ni 0.5000 0.0000 0.5000 0.01733(16) Uani 1 2 d S . . 
Ni2 Ni 0.57072(5) -0.16568(4) 0.71194(3) 0.01825(14) Uani 1 1 d . . . 
O1 O 0.5033(3) 0.1976(2) 0.5942(2) 0.0230(5) Uani 1 1 d . . . 
O2 O 0.5675(3) 0.3118(2) 0.47763(19) 0.0235(5) Uani 1 1 d . . . 
O3 O 0.3016(3) 0.0302(2) 1.0939(2) 0.0228(5) Uani 1 1 d . . . 
O4 O 0.0376(4) -0.1295(3) 1.0496(3) 0.0562(9) Uani 1 1 d . . . 
O5 O 0.7839(3) -0.1614(3) 0.6505(2) 0.0334(6) Uani 1 1 d . . . 
O6 O 1.0359(3) 0.0302(3) 0.7617(3) 0.0461(7) Uani 1 1 d . . . 
N1 N 0.5897(3) 0.6748(3) 0.7567(2) 0.0214(6) Uani 1 1 d . . . 
N2 N 0.3292(3) -0.2128(3) 0.7469(2) 0.0215(6) Uani 1 1 d . . . 
N3 N 1.2355(3) -0.0966(3) 0.4723(2) 0.0228(6) Uani 1 1 d . . . 
N4 N 0.5624(4) 0.0033(3) 0.6818(2) 0.0225(6) Uani 1 1 d . . . 
N5 N 0.5690(4) 0.0988(3) 0.7753(3) 0.0303(7) Uani 1 1 d . . . 
N6 N 0.5752(6) 0.1886(4) 0.8646(3) 0.0612(12) Uani 1 1 d . . . 
C1 C 0.5869(4) 0.5569(3) 0.6693(3) 0.0195(7) Uani 1 1 d . . . 
H1A H 0.600(4) 0.558(4) 0.597(3) 0.027(9) Uiso 1 1 d . . . 
C2 C 0.5708(4) 0.4401(3) 0.6867(3) 0.0212(7) Uani 1 1 d . . . 
C3 C 0.5724(6) 0.4509(4) 0.8069(4) 0.0433(11) Uani 1 1 d . . . 
H3A H 0.547(6) 0.376(5) 0.813(5) 0.075(17) Uiso 1 1 d . . . 
C4 C 0.5876(7) 0.5757(4) 0.9011(4) 0.0522(13) Uani 1 1 d . . . 
H4A H 0.595(6) 0.578(5) 0.988(5) 0.085(16) Uiso 1 1 d . . . 
C5 C 0.5904(6) 0.6824(4) 0.8711(4) 0.0372(9) Uani 1 1 d . . . 
H5A H 0.596(5) 0.762(4) 0.924(4) 0.041(11) Uiso 1 1 d . . . 
C6 C 0.5451(4) 0.3038(3) 0.5769(3) 0.0196(7) Uani 1 1 d . . . 
C7 C 0.3127(4) -0.1307(3) 0.8549(3) 0.0207(7) Uani 1 1 d . . . 
H7A H 0.405(4) -0.041(3) 0.910(3) 0.018(8) Uiso 1 1 d . . . 
C8 C 0.1709(4) -0.1707(3) 0.8927(3) 0.0232(7) Uani 1 1 d . . . 
C9 C 0.0329(5) -0.3001(4) 0.8107(3) 0.0343(9) Uani 1 1 d . . . 
H9A H -0.050(7) -0.348(6) 0.851(5) 0.10(2) Uiso 1 1 d . . . 
C10 C 0.0452(5) -0.3828(4) 0.6960(3) 0.0419(10) Uani 1 1 d . . . 
H10A H -0.050(5) -0.464(4) 0.633(4) 0.052(12) Uiso 1 1 d . . . 
C11 C 0.1943(5) -0.3375(4) 0.6688(3) 0.0339(9) Uani 1 1 d . . . 
H11A H 0.221(5) -0.389(4) 0.592(4) 0.050(12) Uiso 1 1 d . . . 
C12 C 0.1709(4) -0.0810(3) 1.0224(3) 0.0249(7) Uani 1 1 d . . . 
C13 C 1.1697(4) -0.0588(3) 0.5666(3) 0.0238(7) Uani 1 1 d . . . 
H13A H 1.250(4) 0.028(3) 0.642(3) 0.022(9) Uiso 1 1 d . . . 
C14 C 1.0015(4) -0.1323(4) 0.5553(3) 0.0247(7) Uani 1 1 d . . . 
C15 C 0.8940(5) -0.2505(4) 0.4404(4) 0.0370(9) Uani 1 1 d . . . 
H15A H 0.770(6) -0.302(5) 0.426(4) 0.076(16) Uiso 1 1 d . . . 
C16 C 0.9574(5) -0.2876(4) 0.3401(4) 0.0432(10) Uani 1 1 d . . . 
H16A H 0.8866 -0.3639 0.2607 0.052 Uiso 1 1 calc R . . 
C17 C 1.1283(5) -0.2089(4) 0.3603(3) 0.0317(8) Uani 1 1 d . . . 
H17A H 1.173(5) -0.225(4) 0.292(3) 0.032(10) Uiso 1 1 d . . . 
C18 C 0.9324(4) -0.0864(4) 0.6637(3) 0.0263(7) Uani 1 1 d . . . 
 
loop_ 
 _atom_site_aniso_label 
 _atom_site_aniso_U_11 
 _atom_site_aniso_U_22 
 _atom_site_aniso_U_33 
 _atom_site_aniso_U_23 
 _atom_site_aniso_U_13 
 _atom_site_aniso_U_12 
Ni1 0.0236(3) 0.0142(3) 0.0173(3) 0.0068(2) 0.0119(2) 0.0094(2) 
Ni2 0.0250(2) 0.0148(2) 0.0172(2) 0.00648(17) 0.01159(17) 0.00957(18) 
O1 0.0376(13) 0.0141(11) 0.0200(11) 0.0072(9) 0.0142(10) 0.0125(10) 
O2 0.0353(13) 0.0182(11) 0.0192(11) 0.0077(9) 0.0145(10) 0.0121(10) 
O3 0.0272(12) 0.0198(11) 0.0183(11) 0.0054(9) 0.0086(9) 0.0098(10) 
O4 0.0388(17) 0.0493(18) 0.0379(16) -0.0065(13) 0.0247(13) -0.0059(14) 
O5 0.0319(14) 0.0375(15) 0.0385(14) 0.0179(12) 0.0242(11) 0.0167(12) 
O6 0.0391(16) 0.0436(17) 0.0372(15) 0.0036(13) 0.0244(12) 0.0075(13) 
N1 0.0306(15) 0.0170(13) 0.0186(13) 0.0079(11) 0.0123(11) 0.0107(12) 
N2 0.0232(14) 0.0192(13) 0.0198(14) 0.0076(11) 0.0092(11) 0.0068(11) 
N3 0.0262(15) 0.0218(14) 0.0240(14) 0.0112(12) 0.0136(11) 0.0109(12) 
N4 0.0341(16) 0.0171(13) 0.0180(13) 0.0072(11) 0.0120(11) 0.0123(12) 
N5 0.053(2) 0.0246(16) 0.0230(16) 0.0140(14) 0.0150(13) 0.0223(15) 
N6 0.135(4) 0.044(2) 0.0288(18) 0.0169(17) 0.034(2) 0.062(2) 
C1 0.0257(17) 0.0193(16) 0.0155(15) 0.0084(13) 0.0096(13) 0.0099(13) 
C2 0.0271(17) 0.0186(16) 0.0195(16) 0.0078(13) 0.0090(13) 0.0119(14) 
C3 0.090(3) 0.0204(19) 0.028(2) 0.0142(16) 0.031(2) 0.025(2) 
C4 0.115(4) 0.035(2) 0.025(2) 0.0188(18) 0.040(2) 0.039(3) 
C5 0.070(3) 0.0196(18) 0.0294(19) 0.0101(15) 0.0306(19) 0.0215(19) 
C6 0.0228(17) 0.0189(16) 0.0173(16) 0.0067(13) 0.0084(13) 0.0101(13) 
C7 0.0237(17) 0.0179(16) 0.0181(16) 0.0070(13) 0.0070(13) 0.0075(14) 
C8 0.0281(18) 0.0230(17) 0.0167(16) 0.0067(13) 0.0079(13) 0.0113(14) 
C9 0.028(2) 0.034(2) 0.0250(19) 0.0043(16) 0.0124(15) 0.0038(16) 
C10 0.033(2) 0.034(2) 0.024(2) -0.0060(16) 0.0097(16) -0.0037(17) 
C11 0.038(2) 0.0290(19) 0.0215(18) 0.0015(15) 0.0149(16) 0.0086(17) 
C12 0.0272(18) 0.0252(18) 0.0230(17) 0.0084(14) 0.0126(14) 0.0129(15) 
C13 0.0264(18) 0.0233(17) 0.0247(18) 0.0106(14) 0.0133(14) 0.0120(15) 
C14 0.0279(18) 0.0260(17) 0.0287(18) 0.0144(15) 0.0166(14) 0.0154(15) 
C15 0.027(2) 0.035(2) 0.038(2) 0.0081(17) 0.0151(16) 0.0085(17) 
C16 0.032(2) 0.040(2) 0.033(2) -0.0006(17) 0.0127(16) 0.0064(18) 
C17 0.033(2) 0.032(2) 0.0250(19) 0.0074(16) 0.0160(16) 0.0104(16) 
C18 0.032(2) 0.0300(19) 0.0297(18) 0.0172(15) 0.0197(15) 0.0193(16) 
 
_geom_special_details 
; 
 All esds (except the esd in the dihedral angle between two l.s. planes) 
 are estimated using the full covariance matrix.  The cell esds are taken 
 into account individually in the estimation of esds in distances, angles 
 and torsion angles; correlations between esds in cell parameters are only 
 used when they are defined by crystal symmetry.  An approximate (isotropic) 
 treatment of cell esds is used for estimating esds involving l.s. planes. 
; 
 
loop_ 
 _geom_bond_atom_site_label_1 
 _geom_bond_atom_site_label_2 
 _geom_bond_distance 
 _geom_bond_site_symmetry_2 
 _geom_bond_publ_flag 
Ni1 O1 2.077(2) 2_656 ? 
Ni1 O1 2.077(2) . ? 
Ni1 N3 2.097(3) 1_455 ? 
Ni1 N3 2.097(3) 2_756 ? 
Ni1 N4 2.127(3) . ? 
Ni1 N4 2.127(3) 2_656 ? 
Ni2 O2 2.066(2) 2_656 ? 
Ni2 O3 2.074(2) 2_657 ? 
Ni2 O5 2.091(2) . ? 
Ni2 N4 2.092(3) . ? 
Ni2 N1 2.108(3) 1_545 ? 
Ni2 N2 2.139(3) . ? 
O1 C6 1.246(4) . ? 
O2 C6 1.266(4) . ? 
O2 Ni2 2.066(2) 2_656 ? 
O3 C12 1.240(4) . ? 
O3 Ni2 2.074(2) 2_657 ? 
O4 C12 1.263(4) . ? 
O5 C18 1.235(4) . ? 
O6 C18 1.277(4) . ? 
N1 C5 1.335(4) . ? 
N1 C1 1.338(4) . ? 
N1 Ni2 2.108(3) 1_565 ? 
N2 C7 1.339(4) . ? 
N2 C11 1.343(4) . ? 
N3 C13 1.339(4) . ? 
N3 C17 1.342(4) . ? 
N3 Ni1 2.097(3) 1_655 ? 
N4 N5 1.204(4) . ? 
N5 N6 1.141(4) . ? 
C1 C2 1.381(4) . ? 
C1 H1A 0.90(4) . ? 
C2 C3 1.392(5) . ? 
C2 C6 1.518(4) . ? 
C3 C4 1.383(5) . ? 
C3 H3A 0.84(5) . ? 
C4 C5 1.375(6) . ? 
C4 H4A 1.02(5) . ? 
C5 H5A 0.87(4) . ? 
C7 C8 1.380(5) . ? 
C7 H7A 0.95(3) . ? 
C8 C9 1.388(5) . ? 
C8 C12 1.500(4) . ? 
C9 C10 1.383(5) . ? 
C9 H9A 1.05(6) . ? 
C10 C11 1.371(5) . ? 
C10 H10A 0.93(4) . ? 
C11 H11A 1.00(4) . ? 
C13 C14 1.378(5) . ? 
C13 H13A 0.97(3) . ? 
C14 C15 1.385(5) . ? 
C14 C18 1.506(4) . ? 
C15 C16 1.382(5) . ? 
C15 H15A 0.99(5) . ? 
C16 C17 1.380(5) . ? 
C16 H16A 0.9300 . ? 
C17 H17A 0.94(4) . ? 
 
loop_ 
 _geom_angle_atom_site_label_1 
 _geom_angle_atom_site_label_2 
 _geom_angle_atom_site_label_3 
 _geom_angle 
 _geom_angle_site_symmetry_1 
 _geom_angle_site_symmetry_3 
 _geom_angle_publ_flag 
O1 Ni1 O1 180.00(13) 2_656 . ? 
O1 Ni1 N3 89.25(9) 2_656 1_455 ? 
O1 Ni1 N3 90.75(9) . 1_455 ? 
O1 Ni1 N3 90.75(9) 2_656 2_756 ? 
O1 Ni1 N3 89.25(9) . 2_756 ? 
N3 Ni1 N3 180.000(1) 1_455 2_756 ? 
O1 Ni1 N4 92.67(9) 2_656 . ? 
O1 Ni1 N4 87.33(9) . . ? 
N3 Ni1 N4 89.73(10) 1_455 . ? 
N3 Ni1 N4 90.27(10) 2_756 . ? 
O1 Ni1 N4 87.33(9) 2_656 2_656 ? 
O1 Ni1 N4 92.67(9) . 2_656 ? 
N3 Ni1 N4 90.27(10) 1_455 2_656 ? 
N3 Ni1 N4 89.73(10) 2_756 2_656 ? 
N4 Ni1 N4 180.0 . 2_656 ? 
O2 Ni2 O3 175.57(9) 2_656 2_657 ? 
O2 Ni2 O5 82.93(9) 2_656 . ? 
O3 Ni2 O5 99.80(9) 2_657 . ? 
O2 Ni2 N4 93.60(9) 2_656 . ? 
O3 Ni2 N4 89.74(9) 2_657 . ? 
O5 Ni2 N4 93.24(10) . . ? 
O2 Ni2 N1 90.65(9) 2_656 1_545 ? 
O3 Ni2 N1 86.02(9) 2_657 1_545 ? 
O5 Ni2 N1 87.25(10) . 1_545 ? 
N4 Ni2 N1 175.75(10) . 1_545 ? 
O2 Ni2 N2 87.51(9) 2_656 . ? 
O3 Ni2 N2 89.40(9) 2_657 . ? 
O5 Ni2 N2 168.66(10) . . ? 
N4 Ni2 N2 93.42(10) . . ? 
N1 Ni2 N2 86.78(10) 1_545 . ? 
C6 O1 Ni1 133.7(2) . . ? 
C6 O2 Ni2 128.0(2) . 2_656 ? 
C12 O3 Ni2 139.3(2) . 2_657 ? 
C18 O5 Ni2 145.0(2) . . ? 
C5 N1 C1 117.1(3) . . ? 
C5 N1 Ni2 120.9(2) . 1_565 ? 
C1 N1 Ni2 121.8(2) . 1_565 ? 
C7 N2 C11 117.0(3) . . ? 
C7 N2 Ni2 122.2(2) . . ? 
C11 N2 Ni2 120.1(2) . . ? 
C13 N3 C17 117.3(3) . . ? 
C13 N3 Ni1 122.4(2) . 1_655 ? 
C17 N3 Ni1 120.0(2) . 1_655 ? 
N5 N4 Ni2 113.6(2) . . ? 
N5 N4 Ni1 120.2(2) . . ? 
Ni2 N4 Ni1 125.22(12) . . ? 
N6 N5 N4 179.2(3) . . ? 
N1 C1 C2 124.2(3) . . ? 
N1 C1 H1A 116(2) . . ? 
C2 C1 H1A 120(2) . . ? 
C1 C2 C3 117.4(3) . . ? 
C1 C2 C6 120.9(3) . . ? 
C3 C2 C6 121.7(3) . . ? 
C4 C3 C2 118.9(3) . . ? 
C4 C3 H3A 124(3) . . ? 
C2 C3 H3A 116(3) . . ? 
C5 C4 C3 119.1(4) . . ? 
C5 C4 H4A 126(3) . . ? 
C3 C4 H4A 115(3) . . ? 
N1 C5 C4 123.1(3) . . ? 
N1 C5 H5A 112(3) . . ? 
C4 C5 H5A 125(3) . . ? 
O1 C6 O2 127.6(3) . . ? 
O1 C6 C2 116.7(3) . . ? 
O2 C6 C2 115.6(3) . . ? 
N2 C7 C8 123.8(3) . . ? 
N2 C7 H7A 118(2) . . ? 
C8 C7 H7A 118(2) . . ? 
C7 C8 C9 118.2(3) . . ? 
C7 C8 C12 120.8(3) . . ? 
C9 C8 C12 120.9(3) . . ? 
C10 C9 C8 118.4(3) . . ? 
C10 C9 H9A 120(3) . . ? 
C8 C9 H9A 117(3) . . ? 
C11 C10 C9 119.5(3) . . ? 
C11 C10 H10A 119(3) . . ? 
C9 C10 H10A 121(3) . . ? 
N2 C11 C10 122.9(3) . . ? 
N2 C11 H11A 110(2) . . ? 
C10 C11 H11A 127(2) . . ? 
O3 C12 O4 126.2(3) . . ? 
O3 C12 C8 117.9(3) . . ? 
O4 C12 C8 115.9(3) . . ? 
N3 C13 C14 123.3(3) . . ? 
N3 C13 H13A 114(2) . . ? 
C14 C13 H13A 123(2) . . ? 
C13 C14 C15 118.7(3) . . ? 
C13 C14 C18 121.6(3) . . ? 
C15 C14 C18 119.7(3) . . ? 
C16 C15 C14 118.8(4) . . ? 
C16 C15 H15A 120(3) . . ? 
C14 C15 H15A 121(3) . . ? 
C17 C16 C15 118.6(3) . . ? 
C17 C16 H16A 120.7 . . ? 
C15 C16 H16A 120.7 . . ? 
N3 C17 C16 123.2(3) . . ? 
N3 C17 H17A 115(2) . . ? 
C16 C17 H17A 121(2) . . ? 
O5 C18 O6 126.2(3) . . ? 
O5 C18 C14 118.6(3) . . ? 
O6 C18 C14 115.2(3) . . ? 
 
loop_ 
 _geom_torsion_atom_site_label_1 
 _geom_torsion_atom_site_label_2 
 _geom_torsion_atom_site_label_3 
 _geom_torsion_atom_site_label_4 
 _geom_torsion 
 _geom_torsion_site_symmetry_1 
 _geom_torsion_site_symmetry_2 
 _geom_torsion_site_symmetry_3 
 _geom_torsion_site_symmetry_4 
 _geom_torsion_publ_flag 
O1 Ni1 O1 C6 -118(100) 2_656 . . . ? 
N3 Ni1 O1 C6 -123.6(3) 1_455 . . . ? 
N3 Ni1 O1 C6 56.4(3) 2_756 . . . ? 
N4 Ni1 O1 C6 146.7(3) . . . . ? 
N4 Ni1 O1 C6 -33.3(3) 2_656 . . . ? 
O2 Ni2 O5 C18 144.8(4) 2_656 . . . ? 
O3 Ni2 O5 C18 -38.7(4) 2_657 . . . ? 
N4 Ni2 O5 C18 51.6(4) . . . . ? 
N1 Ni2 O5 C18 -124.2(4) 1_545 . . . ? 
N2 Ni2 O5 C18 177.5(4) . . . . ? 
O2 Ni2 N2 C7 -165.8(2) 2_656 . . . ? 
O3 Ni2 N2 C7 17.4(2) 2_657 . . . ? 
O5 Ni2 N2 C7 161.8(4) . . . . ? 
N4 Ni2 N2 C7 -72.3(3) . . . . ? 
N1 Ni2 N2 C7 103.4(3) 1_545 . . . ? 
O2 Ni2 N2 C11 24.1(3) 2_656 . . . ? 
O3 Ni2 N2 C11 -152.7(3) 2_657 . . . ? 
O5 Ni2 N2 C11 -8.3(6) . . . . ? 
N4 Ni2 N2 C11 117.6(3) . . . . ? 
N1 Ni2 N2 C11 -66.7(3) 1_545 . . . ? 
O2 Ni2 N4 N5 152.1(2) 2_656 . . . ? 
O3 Ni2 N4 N5 -25.0(3) 2_657 . . . ? 
O5 Ni2 N4 N5 -124.8(3) . . . . ? 
N1 Ni2 N4 N5 -28.1(15) 1_545 . . . ? 
N2 Ni2 N4 N5 64.4(3) . . . . ? 
O2 Ni2 N4 Ni1 -16.46(16) 2_656 . . . ? 
O3 Ni2 N4 Ni1 166.45(15) 2_657 . . . ? 
O5 Ni2 N4 Ni1 66.65(16) . . . . ? 
N1 Ni2 N4 Ni1 163.3(13) 1_545 . . . ? 
N2 Ni2 N4 Ni1 -104.17(16) . . . . ? 
O1 Ni1 N4 N5 -175.0(3) 2_656 . . . ? 
O1 Ni1 N4 N5 5.0(3) . . . . ? 
N3 Ni1 N4 N5 -85.8(3) 1_455 . . . ? 
N3 Ni1 N4 N5 94.2(3) 2_756 . . . ? 
N4 Ni1 N4 N5 10(100) 2_656 . . . ? 
O1 Ni1 N4 Ni2 -7.12(16) 2_656 . . . ? 
O1 Ni1 N4 Ni2 172.88(16) . . . . ? 
N3 Ni1 N4 Ni2 82.12(16) 1_455 . . . ? 
N3 Ni1 N4 Ni2 -97.88(16) 2_756 . . . ? 
N4 Ni1 N4 Ni2 178(100) 2_656 . . . ? 
Ni2 N4 N5 N6 -3(31) . . . . ? 
Ni1 N4 N5 N6 166(31) . . . . ? 
C5 N1 C1 C2 5.4(5) . . . . ? 
Ni2 N1 C1 C2 -169.1(2) 1_565 . . . ? 
N1 C1 C2 C3 -5.7(5) . . . . ? 
N1 C1 C2 C6 171.9(3) . . . . ? 
C1 C2 C3 C4 0.8(6) . . . . ? 
C6 C2 C3 C4 -176.7(4) . . . . ? 
C2 C3 C4 C5 3.7(7) . . . . ? 
C1 N1 C5 C4 -0.4(6) . . . . ? 
Ni2 N1 C5 C4 174.3(4) 1_565 . . . ? 
C3 C4 C5 N1 -4.1(8) . . . . ? 
Ni1 O1 C6 O2 15.4(5) . . . . ? 
Ni1 O1 C6 C2 -165.2(2) . . . . ? 
Ni2 O2 C6 O1 37.3(5) 2_656 . . . ? 
Ni2 O2 C6 C2 -142.0(2) 2_656 . . . ? 
C1 C2 C6 O1 -168.5(3) . . . . ? 
C3 C2 C6 O1 9.0(5) . . . . ? 
C1 C2 C6 O2 11.0(4) . . . . ? 
C3 C2 C6 O2 -171.6(3) . . . . ? 
C11 N2 C7 C8 3.9(5) . . . . ? 
Ni2 N2 C7 C8 -166.6(2) . . . . ? 
N2 C7 C8 C9 -3.8(5) . . . . ? 
N2 C7 C8 C12 172.2(3) . . . . ? 
C7 C8 C9 C10 0.6(5) . . . . ? 
C12 C8 C9 C10 -175.5(4) . . . . ? 
C8 C9 C10 C11 2.3(6) . . . . ? 
C7 N2 C11 C10 -0.7(6) . . . . ? 
Ni2 N2 C11 C10 169.9(3) . . . . ? 
C9 C10 C11 N2 -2.3(7) . . . . ? 
Ni2 O3 C12 O4 23.4(6) 2_657 . . . ? 
Ni2 O3 C12 C8 -154.2(2) 2_657 . . . ? 
C7 C8 C12 O3 0.5(5) . . . . ? 
C9 C8 C12 O3 176.4(3) . . . . ? 
C7 C8 C12 O4 -177.4(3) . . . . ? 
C9 C8 C12 O4 -1.4(5) . . . . ? 
C17 N3 C13 C14 2.5(5) . . . . ? 
Ni1 N3 C13 C14 -171.3(2) 1_655 . . . ? 
N3 C13 C14 C15 -0.6(5) . . . . ? 
N3 C13 C14 C18 -179.9(3) . . . . ? 
C13 C14 C15 C16 -2.2(6) . . . . ? 
C18 C14 C15 C16 177.2(4) . . . . ? 
C14 C15 C16 C17 2.9(6) . . . . ? 
C13 N3 C17 C16 -1.6(5) . . . . ? 
Ni1 N3 C17 C16 172.3(3) 1_655 . . . ? 
C15 C16 C17 N3 -1.0(6) . . . . ? 
Ni2 O5 C18 O6 22.2(6) . . . . ? 
Ni2 O5 C18 C14 -157.0(3) . . . . ? 
C13 C14 C18 O5 -175.6(3) . . . . ? 
C15 C14 C18 O5 5.1(5) . . . . ? 
C13 C14 C18 O6 5.2(5) . . . . ? 
C15 C14 C18 O6 -174.2(3) . . . . ? 
 
_diffrn_measured_fraction_theta_max    0.979 
_diffrn_reflns_theta_full              25.50 
_diffrn_measured_fraction_theta_full   0.979 
_refine_diff_density_max    0.874 
_refine_diff_density_min   -0.308 
_refine_diff_density_rms    0.095 
